# Supplementary material for: Multi-Omics Comparison of the Spontaneous Diabetes Mellitus and Diet-Induced Prediabetic Macaque Models
Source: Front Pharmacol. 2021 Nov 22;12:784231. doi: 10.3389/fphar.2021.784231 (PMC8645867; doi:10.3389/fphar.2021.784231)
Supplement: Supplementary file 5 [file Table1.XLSX]

## Sheet: Table S1
Table S1. Clinnical test of each macaque individual
Group		Normal control (NC)			High-fat diet (HFD)			Spontaneous Diabetes mellitus (sDM)			Normal control (NC)		High-fat diet (HFD)		Spontaneous Diabetes mellitus (sDM)		HFD / NC		sDM / NC		sDM /HFD
Index		M1	M2	M3	M4	M5	M6	M7	M8	M9	Mean	SD	Mean	SD	Mean	SD	Ratio	p value	Ratio	p value	Ratio	p value
Sex		♂	♂	♂	♂	♂	♂	♂	♂	♂	NA	NA	NA	NA	NA	NA	NA	NA	NA	NA	NA	NA
Age (year)		18.5	18.2	16.3	18.8	17.5	18.3	18.7	18.8	17.1	17.6667	1.19304	18.2	0.655744	18.2	0.953939	1.0302	0.534651	1.0302	0.577978	1	1
Body weight (kg)		7.22	6.27	5.73	8.44	8.76	10.56	7.72	8.07	5.92	6.4067	0.754343	9.2533	1.14286	7.2367	1.15362	1.4443	0.0227456	1.1296	0.355842	0.7821	0.0978706
Blood routine examination	WBC (10/uL)	12.34	12.6	13.26	10.16	12.14	9.44	12.58	8	12.59	12.7333	0.474271	10.58	1.39814	11.0567	2.64716	0.8309	0.0649257	0.8683	0.340969	1.0451	0.796376
	RBC (10^4/uL)	6.54	4.44	6.37	6.24	6.55	7.02	5.8	5.79	7	5.7833	1.16646	6.6033	0.392726	6.1967	0.695725	1.1418	0.312774	1.0715	0.625997	0.9384	0.427758
	HGB (g/L)	154	107	154	146	147	158	141	140	150	138.333	27.1355	150.333	6.65833	143.667	5.50757	1.0867	0.498265	1.0386	0.75542	0.9557	0.252401
	HCT (10^(-1)%)	51.6	40.2	49.3	47.5	48.4	54.3	45.1	45.4	49.7	47.0333	6.02854	50.0667	3.69369	46.7333	2.57358	1.0645	0.498688	0.9936	0.940624	0.9334	0.268953
	MCV (10^(-1)fL)	78.8	90.5	77.3	76.2	73.9	77.4	77.8	78.4	71	82.2	7.22703	75.8333	1.77858	75.7333	4.11015	0.9225	0.212561	0.9213	0.249177	0.9987	0.971003
	MCH (10^(-1)pg)	23.5	24.1	24.1	23.4	22.5	22.5	24.3	24.2	21.5	23.9	0.34641	22.8	0.519615	23.3333	1.5885	0.954	0.0379966	0.9763	0.578614	1.0234	0.609894
	MCHC (g/L)	298	266	312	308	304	291	312	309	302	292	23.5797	301	8.88819	307.667	5.1316	1.0308	0.569662	1.0537	0.323723	1.0221	0.323494
	PLT (10^3/uL)	416	496	328	405	631	329	500	618	339	413.333	84.0317	455	157.086	485.667	140.051	1.1008	0.706133	1.175	0.485804	1.0674	0.813178
	RDW-SD (10^(-1)fL)	41.1	47	35.5	36.5	34.9	46.1	36.8	36.8	34.7	41.2	5.75065	39.1667	6.0575	36.1	1.21244	0.9506	0.694952	0.8762	0.207255	0.9217	0.438372
	RDW-CV (10^(-1)%)	14.8	14.7	13	13.7	13.5	19.2	13.5	13.4	13.9	14.1667	1.0116	15.4667	3.23471	13.6	0.264575	1.0918	0.542797	0.96	0.401046	0.8793	0.42293
	PDW	15.3	11.6	15.7	15.3	15.1	13.2	15.3	15.5	15.3	14.2	2.26053	14.5333	1.15902	15.3667	0.11547	1.0235	0.831355	1.0822	0.465772	1.0573	0.33888
	MPV (10^(-1)fL)	11.3	10.2	12.1	9.4	9.8	11.6	8.5	10.3	11.5	11.2	0.953939	10.2667	1.17189	10.1	1.50997	0.9167	0.34496	0.9018	0.346195	0.9838	0.887262
	P-LCR (10^(-1)%)	37.1	26.8	42.8	21.7	24.9	36.1	15.6	28.3	39.2	35.5667	8.10946	27.5667	7.56131	27.7	11.8114	0.7751	0.279534	0.7788	0.395452	1.0048	0.98765
	PCT (10^(-2)%)	0.47	0.51	0.4	0.38	0.62	0.38	0.42	0.64	0.39	0.46	0.0556776	0.46	0.138564	0.4833	0.136504	1	1	1.0507	0.797551	1.0507	0.845552
	NEUT% (10^(-1)%)	47.1	65.1	43.8	48.6	66.3	47.94	36.5	59.9	61.8	52	11.4643	54.28	10.4149	52.7333	14.0905	1.0438	0.811322	1.0141	0.947611	0.9715	0.885887
	LYMPH% (10^(-1)%)	46.7	22.8	46.9	47	28.9	41.44	54.4	30.4	32.9	38.8	13.8568	39.1133	9.2716	39.2333	13.1941	1.0081	0.975592	1.0112	0.970589	1.0031	0.990334
	MONO% (10^(-1)%)	5.3	7.4	6.6	3.9	4.2	9.54	7.8	7.9	4.8	6.4333	1.05987	5.88	3.1732	6.8333	1.76163	0.914	0.788741	1.0622	0.753062	1.1621	0.672739
	EO% (10^(-1)%)	0.6	0.2	2.5	0.4	0.4	0.54	1	1.7	0.4	1.1	1.22882	0.4467	0.080829	1.0333	0.650641	0.4061	0.454436	0.9394	0.937805	2.3134	0.257686
	BASO% (10^(-1)%)	0.3	4.7	0.2	0.1	0.2	0.74	0.3	0.1	0.1	1.7333	2.5697	0.3467	0.344287	0.1667	0.11547	0.2	0.449124	0.0962	0.401706	0.4808	0.438992
	NEUT# (10/uL)	5.82	8.2	5.8	4.93	8.04	4.51	4.58	4.78	7.78	6.6067	1.3799	5.8267	1.92827	5.7133	1.79258	0.8819	0.599311	0.8648	0.531554	0.9805	0.944145
	LYMPH# (10/uL)	5.76	2.87	6.23	4.78	3.51	3.91	6.84	2.43	4.14	4.9533	1.81946	4.0667	0.649333	4.47	2.22344	0.821	0.47114	0.9024	0.785241	1.0992	0.777989
	MONO# (10/uL)	0.66	0.93	0.88	0.4	0.51	0.9	0.99	0.64	0.6	0.8233	0.143643	0.6033	0.262742	0.7433	0.214554	0.7328	0.272123	0.9028	0.619962	1.232	0.514206
	EO# (10/uL)	0.07	0.03	0.33	0.04	0.05	0.05	0.13	0.14	0.05	0.1433	0.162891	0.0467	0.0057735	0.1067	0.0493288	0.3256	0.412079	0.7442	0.72797	2.2857	0.168075
	BASO# (10/uL)	0.03	0.59	0.02	0.01	0.03	0.07	0.04	0.01	0.02	0.2133	0.326241	0.0367	0.0305505	0.0233	0.0152753	0.1719	0.447501	0.1094	0.419329	0.6364	0.536039
Blood biochemistry panel	GLU (mmol/L)	4	4.33	3.47	4.71	5.65	7.08	18.61	16.85	18.35	3.9333	0.433859	5.8133	1.19341	17.9367	0.950018	1.478	0.0623519	4.5602	2.0375e-05	3.0854	0.000161362
	INS (μIU/mL)	34.7	6.3	16.3	31	50.4	38.4	10.2	19.5	12.8	19.1	14.4056	39.9333	9.79047	14.1667	4.79826	2.0908	0.107022	0.7417	0.603642	0.3548	0.0149351
	C-Peptide (ng/Ml)	4.36	1.37	2.55	3.8	5.2	7.31	2.12	2.52	2.3	2.76	1.50602	5.4367	1.76693	2.3133	0.200333	1.9698	0.116529	0.8382	0.659692	0.4255	0.0903315
	HbA1c (%)	3.8	3.8	3.8	4.5	4.9	4.6	11.6	8.6	10.9	3.8	5.43896e-16	4.6667	0.208167	10.3667	1.5695	1.2281	0.0186932	2.7281	0.0185148	2.2214	0.0227502
	CHOL (mmol/L)	3.24	2.39	2.78	18.05	9.97	11.39	9.88	4.39	2.96	2.8033	0.42548	13.1367	4.3139	5.7433	3.65311	4.6861	0.0522059	2.0488	0.297387	0.4372	0.086171
	TG (mmol/L)	0.99	0.32	0.95	0.23	0.1	0.54	8.24	3.71	3.47	0.7533	0.37581	0.29	0.226053	5.14	2.68736	0.385	0.141244	6.823	0.102913	17.7241	0.0878791
	HDL (mmol/L)	1.12	1.39	1.27	0.84	0.41	1.21	2.33	1.13	0.84	1.26	0.135277	0.82	0.400375	1.4333	0.789958	0.6508	0.145675	1.1376	0.726975	1.748	0.296519
	LDL (mmol/L)	1.06	0.61	0.85	13.45	7.1	7.47	4.67	1.92	1.15	0.84	0.225167	9.34	3.56417	2.58	1.85049	11.119	0.0533815	3.0714	0.243792	0.2762	0.0434357
	TP (g/L)	98.41	73.31	72.27	87.1	83.45	83.98	47.65	82.59	77.9	81.33	14.8009	84.8433	1.97222	69.38	18.9643	1.0432	0.721893	0.8531	0.438085	0.8177	0.29283
	ALB (g/L)	37.87	41.15	35.67	36.99	40.63	32.91	15.15	35.27	35.04	38.23	2.75768	36.8433	3.86209	28.4867	11.5505	0.9637	0.6394	0.7451	0.228327	0.7732	0.300393
	GLOB (g/L)	60.54	32.16	36.6	50.11	42.82	51.07	32.5	47.32	42.86	43.1	15.2658	48	4.51162	40.8933	7.60322	1.1137	0.622171	0.9488	0.833653	0.8519	0.236249
	A/G	0.63	1.28	0.97	0.74	0.95	0.64	0.47	0.75	0.82	0.96	0.325115	0.7767	0.158219	0.68	0.185203	0.809	0.429407	0.7083	0.264651	0.8755	0.529633
	TBIL (μmol/L)	8.95	1.83	3.11	3.48	4.35	2.31	0.62	3.49	2.39	4.63	3.79558	3.38	1.02367	2.1667	1.44798	0.73	0.611125	0.468	0.352856	0.641	0.301568
	DBIL (μmol/L)	1.31	0.59	1.29	0.9	1.3	0.55	0.14	0.66	0.76	1.0633	0.410041	0.9167	0.375278	0.52	0.332866	0.8621	0.671375	0.489	0.149358	0.5673	0.242658
	ALT (U/L)	61.2	105.7	73.3	89.7	30.8	66.3	32.2	118.3	63.5	80.0667	23.0088	62.2667	29.6564	71.3333	43.5812	0.7777	0.457569	0.8909	0.774205	1.1456	0.780608
	AST (U/L)	51.8	34.4	42.3	51.1	44.8	39.9	42	49	28.9	42.8333	8.71225	45.2667	5.61456	39.9667	10.2031	1.0568	0.705092	0.9331	0.730086	0.8829	0.474639
	GGT (U/L)	44.4	63.6	80.2	65.1	76.5	79.8	61.5	111.2	220.1	62.7333	17.9157	73.8	7.71298	130.933	81.1205	1.1764	0.381393	2.0871	0.228114	1.7742	0.346646
	ALP (U/L)	182.24	246.15	187.77	150.61	117.84	372.56	275.85	195.36	352.08	205.387	35.4102	213.67	138.575	274.43	78.3696	1.0403	0.924924	1.3362	0.236725	1.2844	0.544714
	CK (U/L)	671.8	190.8	292.6	289.8	216.5	565.7	172.7	224.5	193	385.067	253.481	357.333	184.135	196.733	26.101	0.928	0.88557	0.5109	0.326643	0.5506	0.268758
	BUN (mmol/L)	7.2	6.5	9.2	4.7	5.2	6	8	5.2	7.8	7.6333	1.40119	5.3	0.655744	7	1.56205	0.6943	0.0592718	0.917	0.62876	1.3208	0.157191
	CREA (μmol/L)	61.6	76.8	79.7	79.5	86.9	100.1	59.4	54.7	64.8	72.7	9.72163	88.8333	10.4352	59.6333	5.05404	1.2219	0.121649	0.8203	0.107771	0.6713	0.0120434
	K (mmol/L)	6.54	4.87	6.68	6.69	5.89	5.68	5.5	5.34	6.38	6.03	1.00703	6.0867	0.532948	5.74	0.56	1.0094	0.935491	0.9519	0.685388	0.943	0.480704
	Na (mmol/L)	153.8	150.4	150.2	141	158.1	151.3	146.6	147.1	148.7	151.467	2.0232	150.133	8.60949	147.467	1.09697	0.9912	0.806889	0.9736	0.0395361	0.9822	0.64633
	Cl (mmol/L)	111.2	107.9	109.4	113.9	116.4	109.1	107	104.4	108	109.5	1.65227	113.133	3.7099	106.467	1.85831	1.0332	0.196174	0.9723	0.102161	0.9411	0.0496719
Urinalysis	Urine color	pale yellow	pale yellow	pale yellow	pale yellow	pale yellow	pale yellow	pale yellow	pale yellow	pale yellow	NA	NA	NA	NA	NA	NA	NA	NA	NA	NA	NA	NA
	Urine clarity	clear	clear	clear	clear	clear	clear	clear	clear	clear	NA	NA	NA	NA	NA	NA	NA	NA	NA	NA	NA	NA
	Urine Glucose	-	-	-	-	-	-	++++	+++	++++	NA	NA	NA	NA	NA	NA	NA	NA	NA	NA	NA	NA
	Bilirubin (μmol/L)	-	-	-	+	-	-	-	-	-	NA	NA	NA	NA	NA	NA	NA	NA	NA	NA	NA	NA
	Ketones (mmol/L)	-	-	-	-	-	-	++	-	small amount	NA	NA	NA	NA	NA	NA	NA	NA	NA	NA	NA	NA
	Specific gravity	1.015	1.02	1.025	1.02	1.015	1.02	1.03	1.015	1.02	1.02	0.005	1.0183	0.00288675	1.0217	0.00763763	0.9984	0.64333	1.0016	0.767644	1.0033	0.518519
	pH	8	7.5	8	6	7	8	6.5	7.5	7	7.8333	0.288675	7	1	7	0.5	0.8936	0.237796	0.8936	0.0667665	1	1
	Protein	-	-	++	small amount	small amount	++	++	-	-	NA	NA	NA	NA	NA	NA	NA	NA	NA	NA	NA	NA
	Urobilinogen	normal	normal	normal	normal	normal	normal	normal	normal	normal	NA	NA	NA	NA	NA	NA	NA	NA	NA	NA	NA	NA
	Nitrite	-	+	-	-	-	+	-	+	-	NA	NA	NA	NA	NA	NA	NA	NA	NA	NA	NA	NA
	Hemoglobin (cell/μL)	-	-	-	-	-	+	+	-	+	NA	NA	NA	NA	NA	NA	NA	NA	NA	NA	NA	NA
	Leukocyte esterase (/μl)	-	-	-	-	-	-	-	-	-	NA	NA	NA	NA	NA	NA	NA	NA	NA	NA	NA	NA
	K (mmol/L)	256	119.7	592.6	388.8	282.9	108.4	269.8	241	236.3	322.767	243.417	260.033	141.592	249.033	18.1373	0.8056	0.719249	0.7716	0.652519	0.9577	0.905695
	Na (mmol/L)	45.9	26	140.2	93	44.4	54.7	52.4	140.2	100.7	70.7	61.0057	64.0333	25.609	97.7667	43.9734	0.9057	0.869931	1.3828	0.566808	1.5268	0.314888
	Cl (mmol/L)	207.8	99.8	2025	650.4	373.5	67.6	160	271.2	408.1	777.533	1081.69	363.833	291.52	279.767	124.272	0.4679	0.557217	0.3598	0.509598	0.7689	0.669758
	GLU (mmol/L)	0.03	0.23	0.21	0.46	0.2	0.65	105.93	106.27	106.13	0.1567	0.110151	0.4367	0.225906	106.11	0.17088	2.7872	0.125869	677.298	9.03748e-12	243	3.44152e-11
	mALB (mg/L)	7.38	6.32	510.09	5.71	40.45	185.3	586.76	25.62	47.27	174.597	290.546	77.1533	95.2549	219.883	317.909	0.4419	0.610345	1.2594	0.864339	2.85	0.497712
	UCR (μmol/L)	3156	19788	23199	96111	32742	49011	2092	2613	3991	15381	10723.7	59288	32910.8	2898.67	981.2	3.8546	0.0929554	0.1885	0.180354	0.0489	0.0971295
